# Supplementary material for: Hydrogenated black TiO2nanowires decorated with Ag nanoparticles as sensitive and reusable surface-enhanced Raman scattering substrates
Source: Royal Society of Chemistry journal article supplement (doi:10.1039/c5ra04352b), 2015-01-01
Supplement: c5ra04352b1.pdf [file c5ra04352b1.pdf]

# Hydrogenated Black TiO<sub>2</sub> Nanowires Decorated by Ag Nanoparticles as Highly-Improved Sensitive and Reusable SERS Substrates

Yufeng Shan,<sup>a,b</sup> Yong Yang,<sup>\*a,b</sup> Yanqin Cao,<sup>a,b</sup> Hao Yin,<sup>c</sup> Nguyen Viet Long<sup>a,b</sup> and  
Zhengren Huang <sup>a,b</sup>

<sup>a</sup> State Key Laboratory of High Performance Ceramics and Superfine Microstructures,  
Shanghai Institute of Ceramics, Chinese Academy of Sciences, 1295 Dingxi Road,  
Shanghai 200050, China

<sup>b</sup> Graduate School of the Chinese Academy of Sciences, Beijing, China

<sup>c</sup> Shanghai Youlan technology Co, Ltd, 350 Xianxia road, Shanghai 200050, China

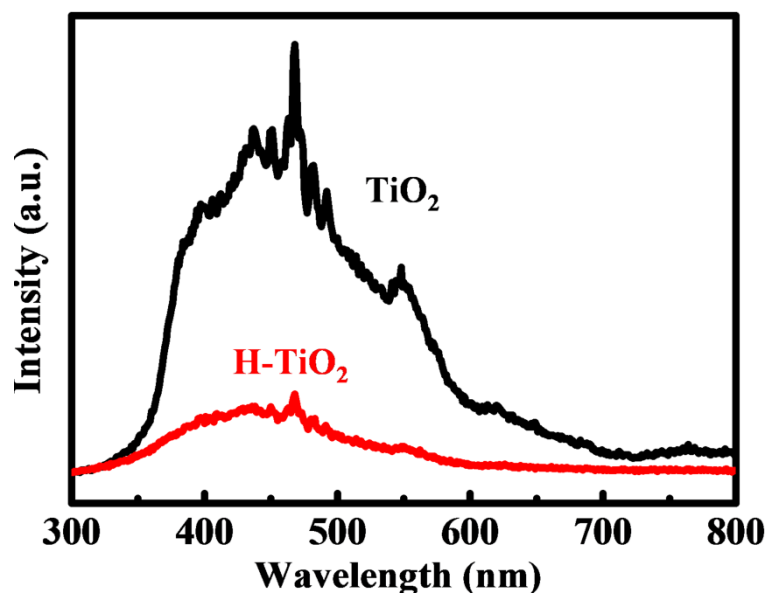

**Fig. S1.** Photoluminescent spectra of TiO<sub>2</sub> NWs and H-TiO<sub>2</sub> NWs, respectively. Excitation wavelength: 310 nm

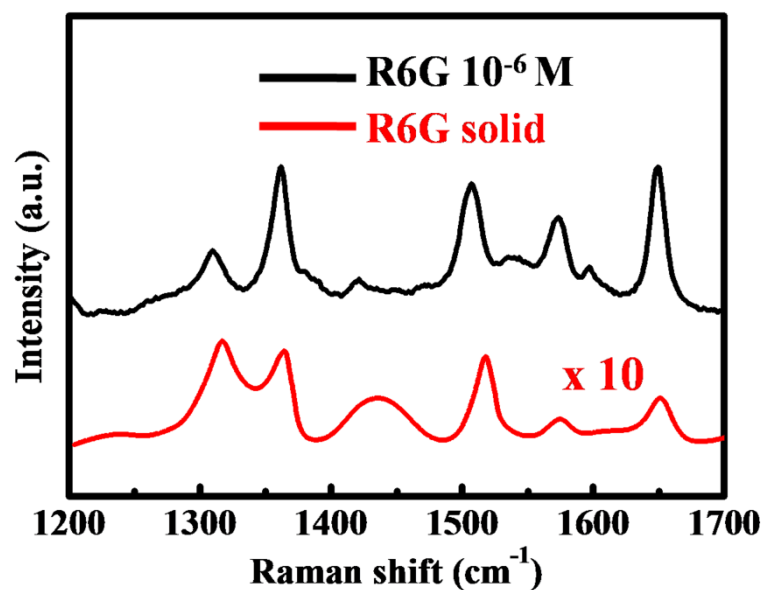

**Fig. S2.** Normal Raman spectra of solid R6G and SERS spectra of  $10^{-6}$  M R6G adsorbed on Ag/H-TiO<sub>2</sub> NWs. For better comparison, the intensity of solid R6G Raman spectra is multiplied by 10.

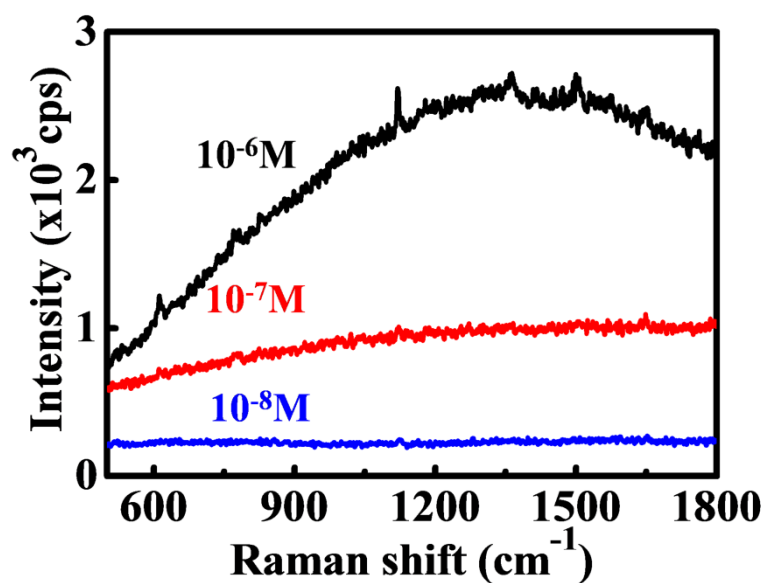

**Fig. S3.** SERS spectra collected on Ag/TiO<sub>2</sub> NWs exposed to different R6G concentrations. For  $10^{-6}$  M to  $10^{-9}$  M: excitation, 514 nm; power,  $\sim 0.3$  mW; data collection, 10 s.

(a)

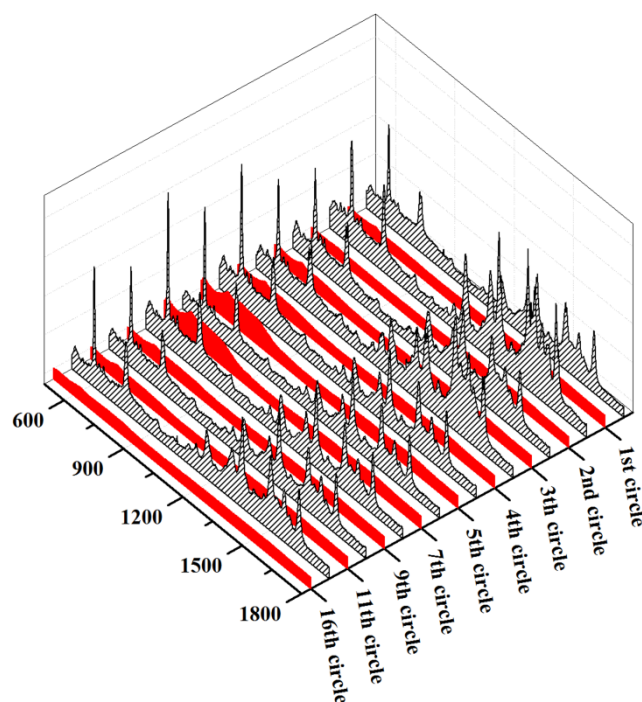

(b)

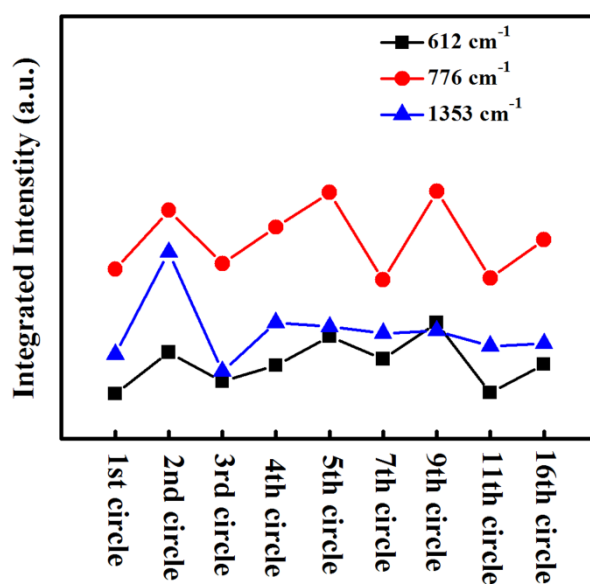

**Fig. S4.** (a) Raman spectra of R6G molecules recorded over 16 cycles of recycling. (b) The calculated integrated intensity of main peaks at 612 cm<sup>-1</sup>, 776 cm<sup>-1</sup> and 1353 cm<sup>-1</sup> of R6G Raman spectra collected in various circle. For the sake of clarity and brevity, some circles of recycling were not given.

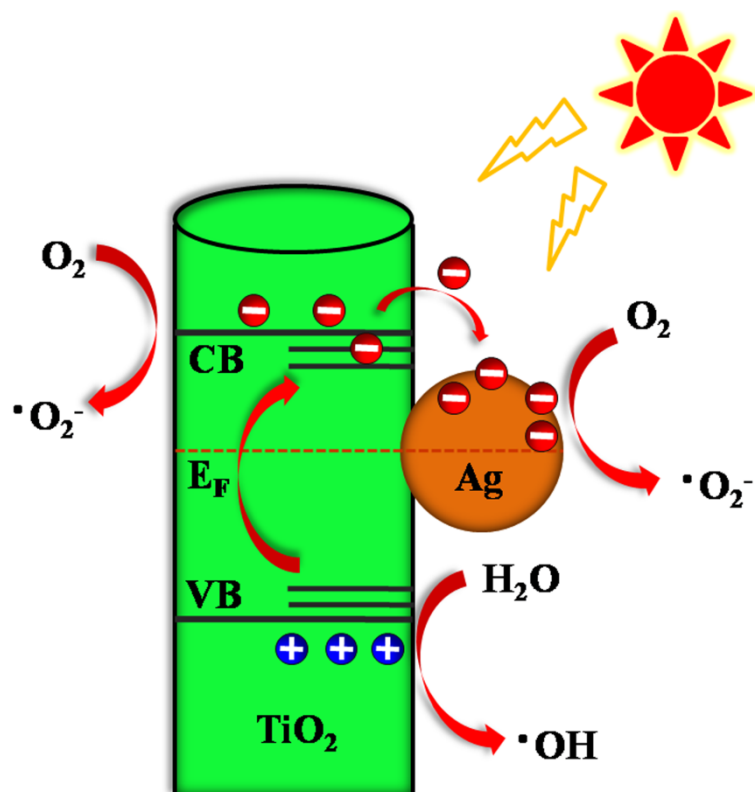

**Fig. S5.** Schematic diagram of the photocatalytic mechanism occurring within Ag/H-TiO<sub>2</sub> NWs.

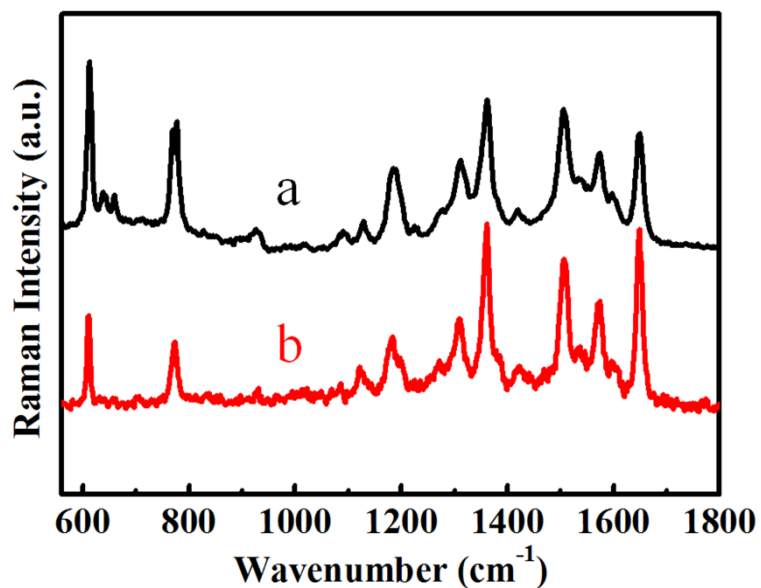

**Fig. S6.** The SERS spectra of 10<sup>-6</sup> M R6G molecules obtained from (a) the substrate of Ag/H-TiO<sub>2</sub> prepared at least 6 months ago and (b) the freshly prepared substrate.

### EF Calculation Method

The Raman enhancement factor (EF) can be estimated based on Fig. S2 by the

formula as followed:<sup>1</sup>

$$EF = \left( \frac{I_{SERS}}{I_{bulk}} \right) \left( \frac{M_{bulk}}{M_{SERS}} \right)$$

$I_{SERS}$  and  $I_{bulk}$  refer to integrated intensities of the same R6G Raman peak collected on solid R6G and the Ag/H-TiO<sub>2</sub> NWs substrate with 10<sup>-6</sup> M R6G molecules adsorbed on the surface.  $M_{SERS}$  and  $M_{bulk}$  are the number of adsorbed molecules and molecules in solid phase, and they are calculated based on the estimated concentration of surface R6G. Here, Raman peak at 1650 cm<sup>-1</sup> are chosen to calculate the EF. Taking the volume of laser spot and the density of solid R6G (0.79 g/cm<sup>3</sup>) into account, the EF is estimated to be  $\sim 1 \times 10^8$ .

1 Y. Peng, L. Qiu, C. Pan, C. Wang, S. Shang and F. Yan, *Electrochimica Acta*, 2012, **75**, 399-405.
